# Supplementary material
Source: PubMed Central journal article supplement (PMC2664104)
Supplement: NIHMS98511-supplement-1_si_001.pdf [file NIHMS98511-supplement-1_si_001.pdf]

# Direct and Quantitative Characterization of Dynamic Ligand Exchange between Coordination-Driven Self-Assembled Supramolecular Polygons

*Yao-Rong Zheng\* and Peter J. Stang\**

Department of Chemistry, University of Utah, 315 South 1400 East, RM, 2020, Salt  
Lake City, Utah, 84112.

E-mail: zheng@chem.utah.edu; stang@chem.utah.edu

## Table of Contents

|                                                                                                                                                                                                                                  |    |
|----------------------------------------------------------------------------------------------------------------------------------------------------------------------------------------------------------------------------------|----|
| Experimental details of dynamic ligand exchange between supramolecular rectangles ( <b>5a</b> and <b>5b</b> ) and triangles ( <b>6a</b> and <b>6b</b> ).....                                                                     | S2 |
| ESI-MS spectra of mixtures of rectangles ( <b>5a</b> and <b>5b</b> ) and triangles ( <b>6a</b> and <b>6b</b> ).....                                                                                                              | S2 |
| Multinuclear NMR ( $^3\text{P}\{^1\text{H}\}$ and Partial $^1\text{H}$ ) spectra mixtures of rectangles ( <b>5a</b> and <b>5b</b> ), triangles ( <b>6a</b> and <b>6b</b> ), and rectangle <b>5a</b> and triangle <b>6b</b> ..... | S5 |
| Experimental details and kinetic analysis of dynamic ligand exchange between rectangles ( <b>5a</b> and <b>5b</b> ).....                                                                                                         | S7 |

**Methods and Materials.** 0° and 60° organoplatinum acceptor **3**<sup>1</sup> and **4**<sup>2</sup> as well as the rectangles<sup>1</sup> (**5a** and **5b**) and triangles<sup>2</sup> (**6a** and **6b**) were prepared according to literature procedures. 4,4'-dipyridyl-*d*<sub>8</sub> **2** was purchased from C/D/N Isotope Inc. Deuterated acetone and water was purchased from Cambridge Isotope Laboratory (Andover, MA). NMR spectra were recorded on a Varian Unity 300 spectrometer. The <sup>1</sup>H NMR chemical shifts are reported relative to residual solvent signals, and <sup>31</sup>P NMR resonances are referenced to an external unlocked sample of 85% H<sub>3</sub>PO<sub>4</sub> (δ 0.0). Mass spectra were recorded on a Micromass Quattro II triple-quadrupole mass spectrometer using electrospray ionization with a MassLynx operating system.

**General Procedure for the Dynamic Ligand Exchange Experiment.** Individually prepared rectangles (**5a** and **5b**) and triangles (**6a** and **6b**) were mixed in 1:1 ([**5a**]<sub>0</sub> = 2.14 mM and [**5b**]<sub>0</sub> = 2.14 mM), 1:1 ([**6a**]<sub>0</sub> = 1.43 mM and [**6b**]<sub>0</sub> = 1.43 mM), and 3:2 ([**5a**]<sub>0</sub> = 2.14 mM and [**6b**]<sub>0</sub> = 1.43 mM) ratios in the aqueous acetone solution (Acetone-*d*<sub>6</sub>/D<sub>2</sub>O 1:1) to carry out the study of ligand exchange between the same (**5a** + **5b** as well as **6a** + **6b**) and different (**5a** + **6b**) types of polygons. Upon heating at 64 ± 1 °C, the mixtures were periodically transferred for ESI-MS and NMR analysis.

**Figure S1.** Calculated (blue) and experimental (red) ESI-MS spectra (Acetone-*d*<sub>6</sub>/D<sub>2</sub>O 1:1) (a) individually prepared **5b**, (b) individually prepared **5a**, (c) **5c** (calculated) (d) initial mixture of **5a** and **5b**, and (e) equilibrated mixture of **5a**, **5b**, and **5c**.

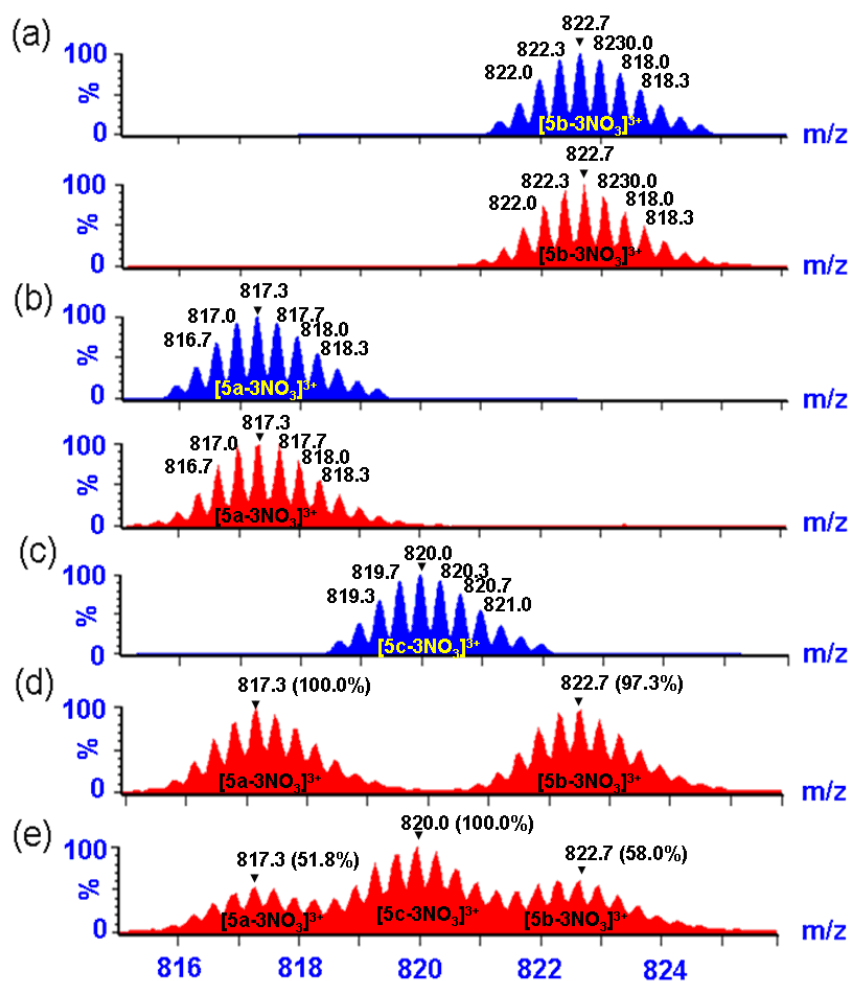

**Figure S2.** Calculated (blue) and experimental (red) ESI-MS spectra (Acetone- $d_6$ /D $_2$ O 1:1) (a) individually prepared **6b**, (b) individually prepared **6a**, (c) **6c** (calculated), (d) **6d** (calculated), (e) initial mixture of **6a** and **6b**, and (f) equilibrated mixture of **6a**, **6b**, **6c**, and **6d**.

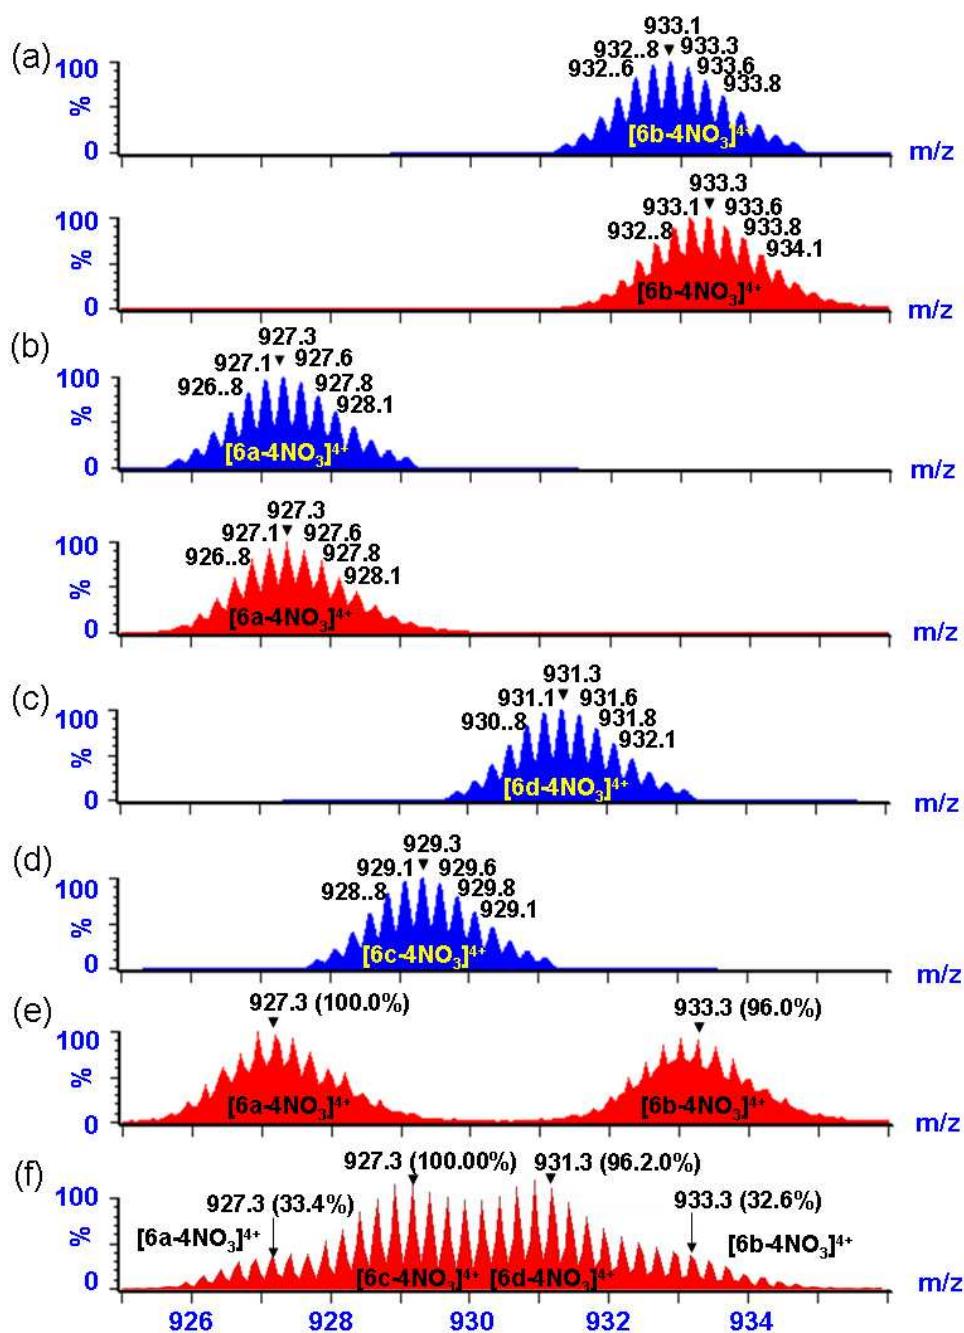

**Figure S3.** ESI-MS spectra (Acetone- $d_6$ /D $_2$ O 1:1) (a) and (c) initial mixture of **5a** and **6b** and (b) and (d) equilibrated mixture of **5a**, **5b**, **5c**, **6a**, **6b**, **6c**, and **6d**.

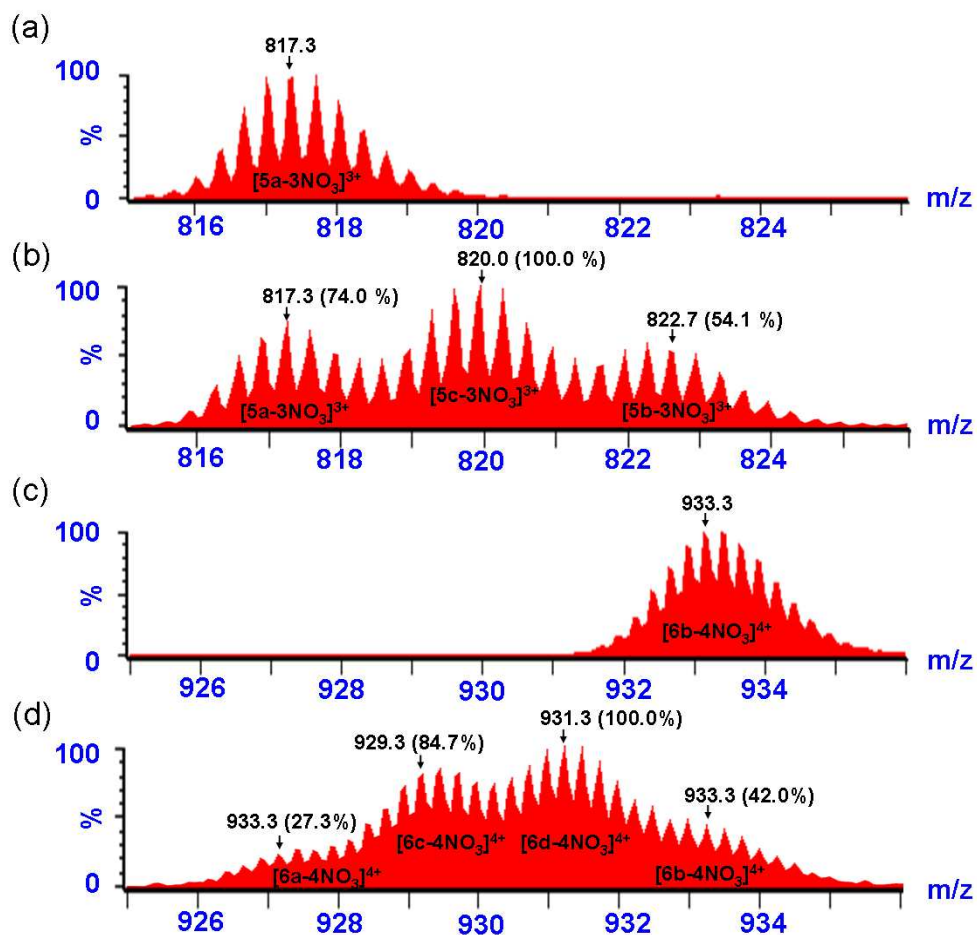

**Figure S4.**  $^1\text{H}$  and  $^{31}\text{P}\{^1\text{H}\}$  NMR spectra of (a) individually prepared **5b**, (b) individually prepared **5a**, (c) initial mixture of **5a** and **5b**, and (d) equilibrated mixture of **5a**, **5b**, and **5c**.

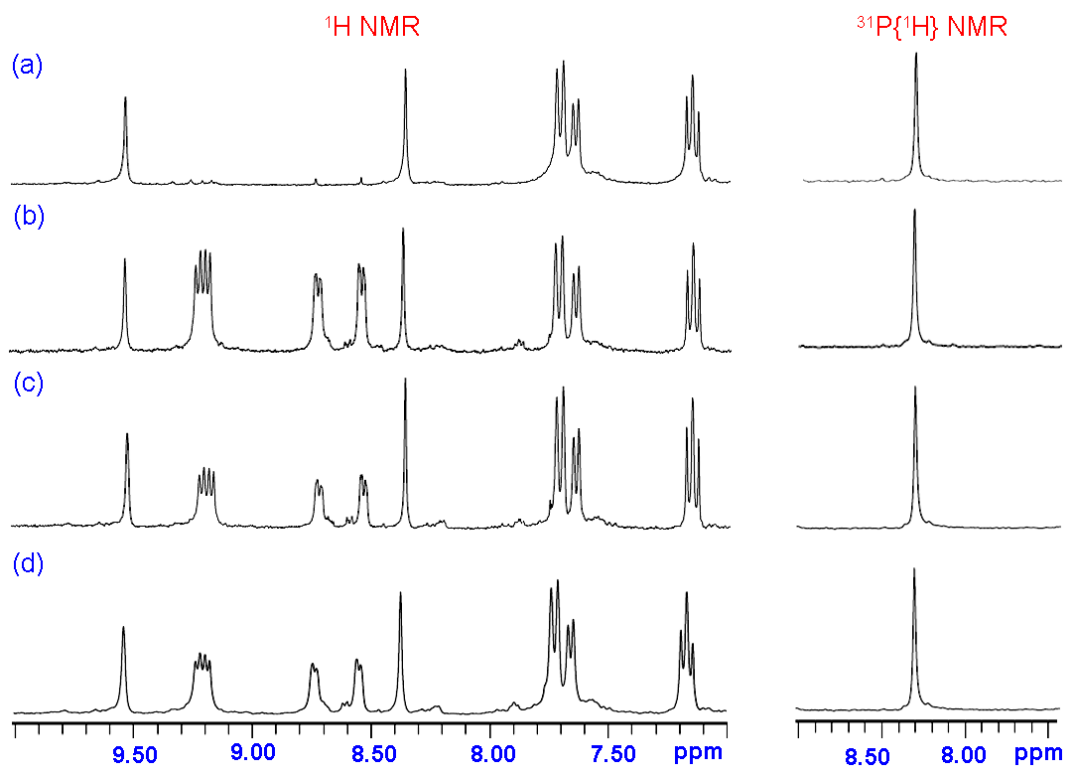

**Figure S5.**  $^1\text{H}$  and  $^{31}\text{P}\{^1\text{H}\}$  NMR spectra of (a) individually prepared **6b**, (b) individually prepared **6a**, (c) initial mixture of **6a** and **6b**, and (d) equilibrated mixture of **6a**, **6b**, **6c**, and **6d**.

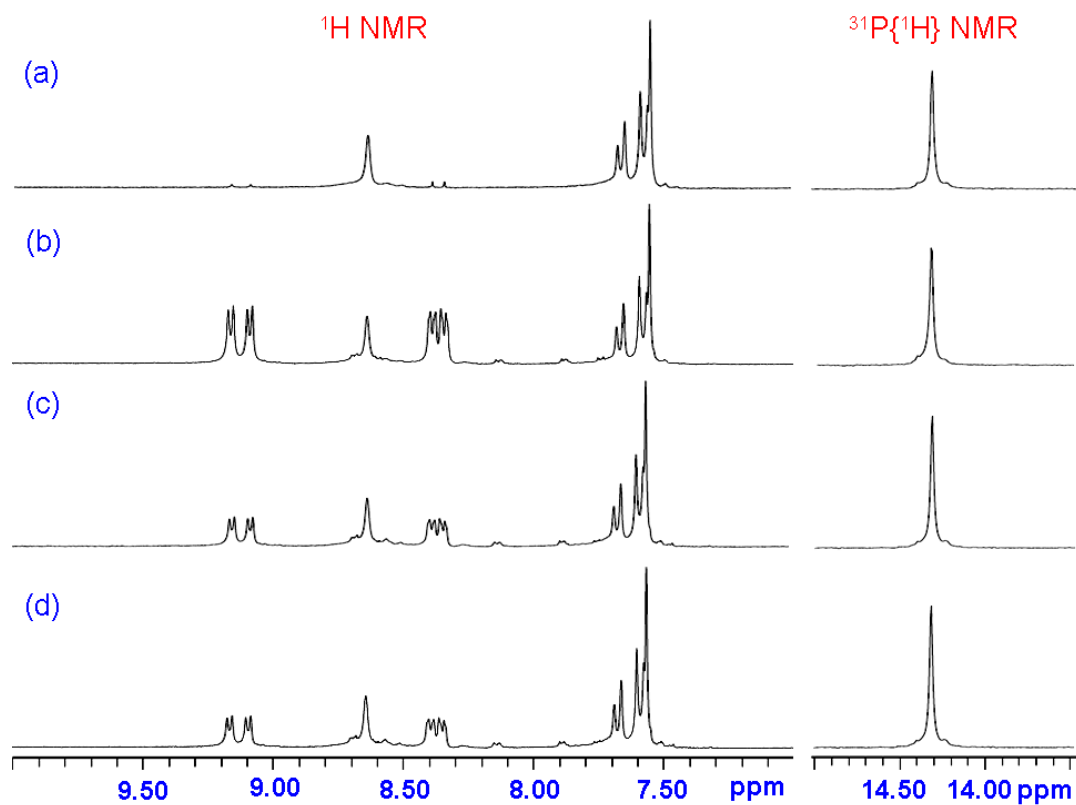

**Figure S6.**  $^1\text{H}$  and  $^{31}\text{P}\{^1\text{H}\}$  NMR spectra of (a) individually prepared **5b**, (b) individually prepared **5a**, (c) individually prepared **6b**, (d) individually prepared **6a**, (e) initial mixture of **5a** and **6b**, and (f) equilibrated mixture of **5a**, **5b**, **5c**, **6a**, **6b**, **6c**, and **6d**.

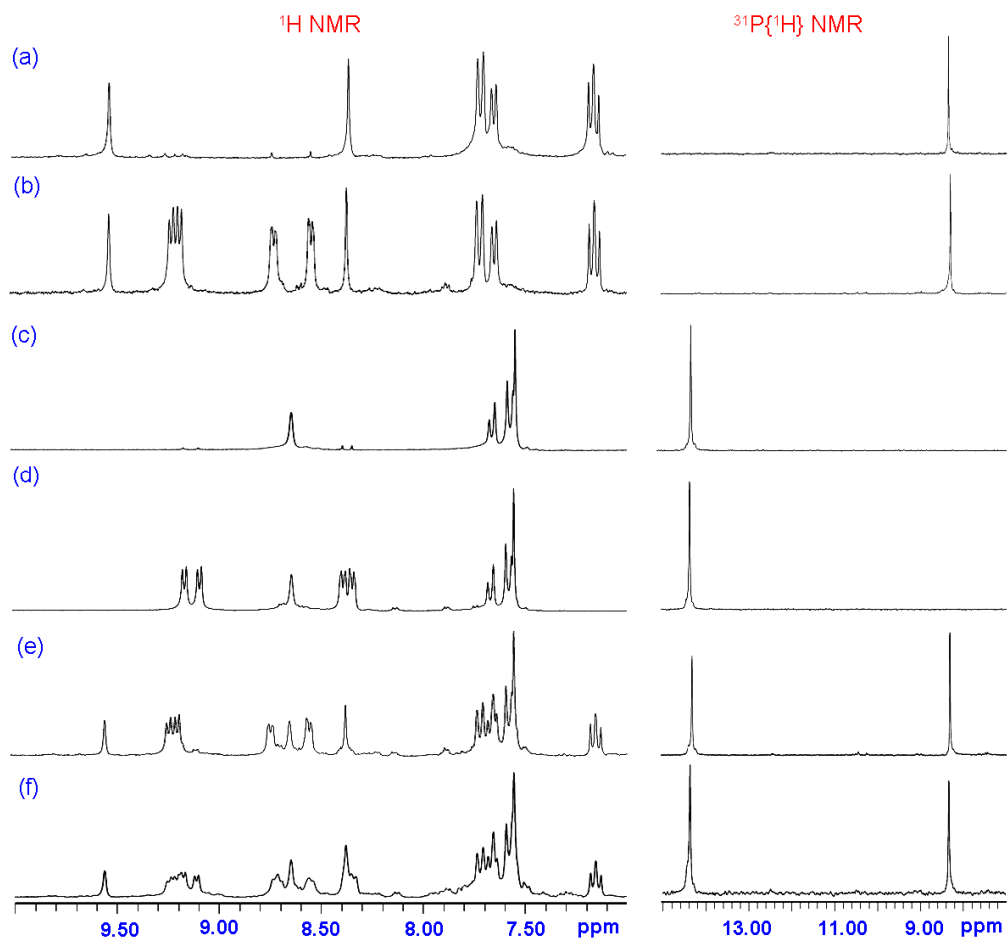

### Kinetic analysis of ESI-MS data of the dynamic exchange between rectangles **5a** and **5b**.

**Figure S7.** ESI-MS spectra (Acetone-*d*<sub>6</sub>/D<sub>2</sub>O 1:1) for dynamic ligand exchange between **5a** and **5b** recorded at different time intervals: (a) 20 h, (b) 43 h, (c) 66 h, (d) 89 h, (e) 161 h, and (f) 206 h.

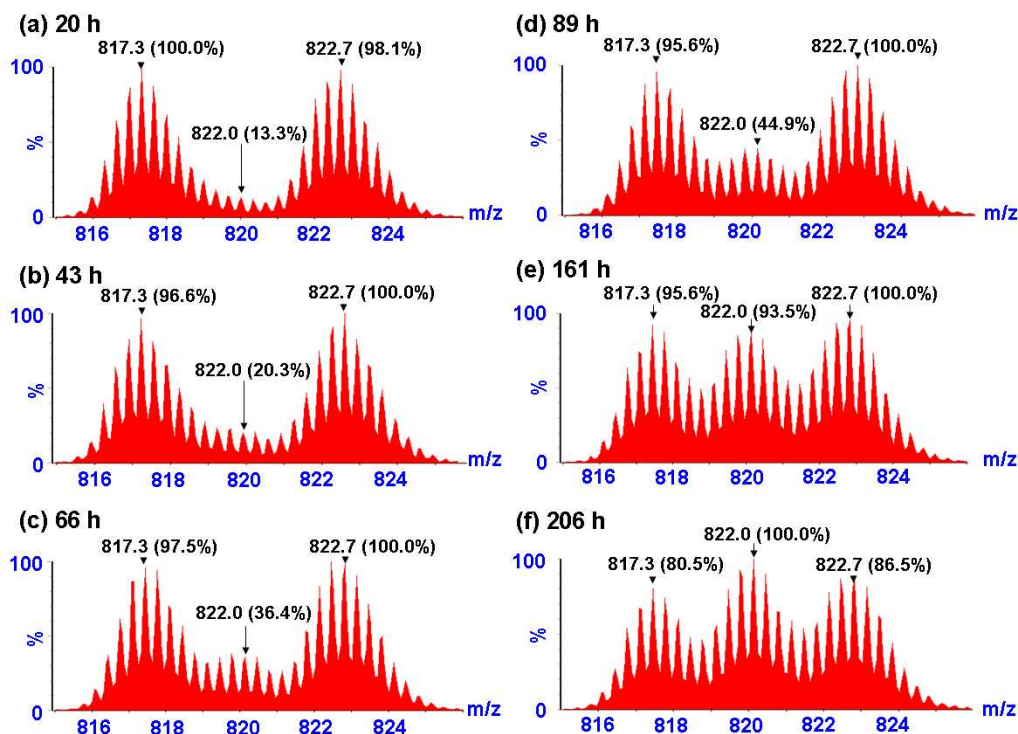

**Table S1.** Kinetic data extracted from ESI-MS spectra (Figure S7) of the dynamic exchange between rectangles **5a** and **5b**.

| <b>t</b> (h) | $[\mathbf{5c}]_t / [\mathbf{5a}]_t$ | $[\mathbf{5a}]_0 / [\mathbf{5a}]_t$ | $\text{Ln}([\mathbf{5a}]_0 / [\mathbf{5a}]_t)$ |
|--------------|-------------------------------------|-------------------------------------|------------------------------------------------|
| 0            | 0.000                               | 1.00                                | 0.000                                          |
| 20           | 0.133                               | 1.07                                | 0.064                                          |
| 43           | 0.210                               | 1.11                                | 0.100                                          |
| 66           | 0.373                               | 1.19                                | 0.171                                          |
| 89           | 0.470                               | 1.24                                | 0.211                                          |
| 161          | 0.978                               | 1.49                                | 0.398                                          |
| 206          | 1.24                                | 1.62                                | 0.482                                          |

$[\mathbf{5c}]_t / [\mathbf{5a}]_t$  is determined by the ratio of the intensity of peaks for **5c** (820.0) and **5a** (817.3) in the ESI-MS spectra recorded at specific time (**t**) (Figure S7).

$\therefore$  Rectangle (**5a**) + Rectangle (**5b**)  $\rightleftharpoons$  2 Rectangle (**5c**)

$\therefore [\mathbf{5a}]_0 = [\mathbf{5a}]_t + [\mathbf{5c}]_t / 2$

$\therefore [\mathbf{5a}]_0 / [\mathbf{5a}]_t = 1 + ([\mathbf{5c}]_t / [\mathbf{5a}]_t) / 2$

The apparent rate constant  $k$  for the dynamic exchange between rectangles **5a** and **5b** was determined by fitting the data (Table S1) to the first-order kinetic equation:

$$\ln([\mathbf{5a}]_0 / [\mathbf{5a}]_t) = kt$$

**Figure S8.** The first-order kinetic treatment of the data obtained at varied time intervals (0–240 h) for ligand exchange between **5a** and **5b**.

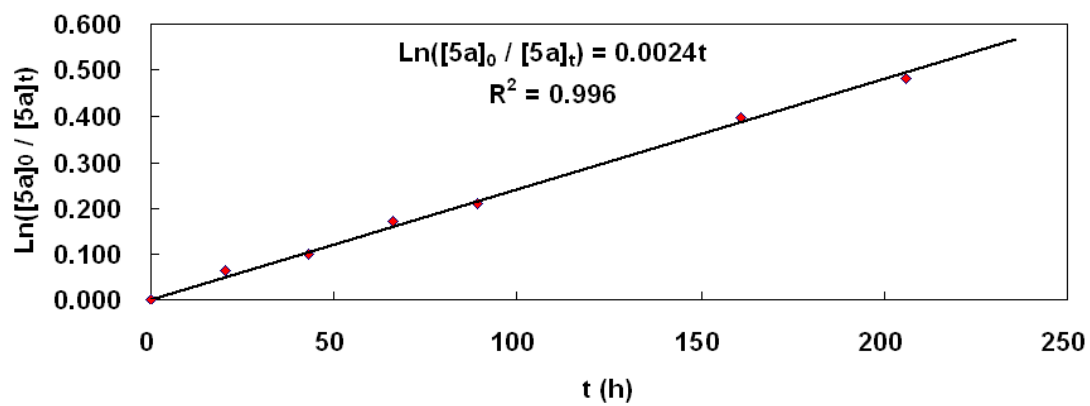

Reference:

(1) Kuehl, C. J.; Huang, S. D.; Stang, P. J. *J. Am. Chem. Soc.* **2001**, *123*, 9634.



(2) Kryshenko, Y. K.; Seidel, S. R.; Arif, A. M.; Stang, P. J. *J. Am. Chem. Soc.* **2003**, *125*, 5193.
